# Supplementary material for: Vitamin D deficiency is associated with a worse prognosis in metastatic melanoma
Source: PubMed Central journal article supplement (PMC5351676; doi:10.18632/oncotarget.14316), 2016-12-28
Supplement: oncotarget-08-6873-s001.pdf [file oncotarget-08-6873-s001.pdf]

# Vitamin D deficiency is associated with a worse prognosis in metastatic melanoma

## SUPPLEMENTARY FIGURE AND TABLES

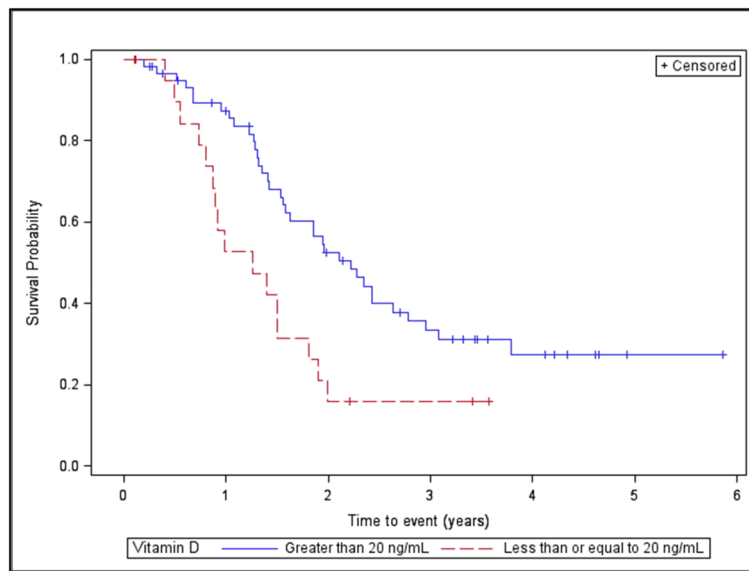

**Supplementary Figure 1: Survival Curve for Patients with Metastatic (Stage IV) Melanoma grouped by Presence of Initial Vitamin D Deficiency.**

**Supplementary Table 1: Unadjusted and Adjusted Hazard Ratios for Death from Melanoma associated with Vitamin D level in Patients with Metastatic Melanoma**

|                                                   | Metastatic                |                         |
|---------------------------------------------------|---------------------------|-------------------------|
|                                                   | Unadjusted HR<br>(95% CI) | Adjusted HR<br>(95% CI) |
| Age (yrs)                                         |                           |                         |
| ≤ 50                                              | 1 (Reference)             | 1 (Reference)           |
| > 50                                              | 1.00 (0.50, 2.02)         | 1.29 (0.60, 2.78)       |
| Sex                                               |                           |                         |
| Female                                            | 1 (Reference)             | 1 (Reference)           |
| Male                                              | 1.69 (0.82, 3.47)         | 1.56 (0.74, 3.29)       |
| LDH (U/L)                                         |                           |                         |
| ≤ 240                                             | 1 (Reference)             | 1 (Reference)           |
| > 240                                             | 2.43 (1.15, 5.12) †       | 2.48 (1.10, 5.58) †     |
| Vitamin D (ng/mL)                                 |                           |                         |
| Initial Vitamin D > 20, > 20 increase             | 1 (Reference)             | 1 (Reference)           |
| Initial Vitamin D > 20, decrease or ≤ 20 increase | 1.21 (0.36, 4.08)         | 0.91 (0.26, 3.21)       |
| Initial Vitamin D ≤ 20, > 20 increase             | 1.70 (0.41, 7.13)         | 1.09 (0.24, 4.96)       |
| Initial Vitamin D ≤ 20, decrease or ≤ 20 increase | 5.18 (1.26, 21.38) †      | 4.68 (1.05, 20.88) †    |

†p&lt;0.05.

N=2 missing LDH.

Model N=51.

Alternative adjusted hazard ratios: Vitamin D ≤ 20 ng/mL at either time point: 2.26 (1.23, 4.17) †.

Sample size:

Initial Vitamin D &gt; 20, &gt; 20 increase (N=5)

Initial Vitamin D &gt; 20, decrease or ≤ 20 increase (N=32)

Initial Vitamin D ≤ 20, &gt; 20 increase (N=7)

Initial Vitamin D ≤ 20, decrease or ≤ 20 increase (N=7)

Supplementary Table 2: Vitamin D by Season

|                        | Winter<br>(N=80, 31.7%) | Spring<br>(N=61, 24.2%) | Summer<br>(N=52, 20.6%) | Fall<br>(N=59, 23.4%) |
|------------------------|-------------------------|-------------------------|-------------------------|-----------------------|
| Median (IQR) Vitamin D | 29.0 (15.5)             | 27.0 (18.0)             | 31.5 (12.0)             | 30.0 (16.0)           |
| Vitamin D (ng/mL)      | N (%)                   |                         |                         |                       |
| ≤ 20                   | 13 (16.3)               | 14 (23.0)               | 5 (9.6)                 | 12 (20.3)             |
| (20-40]                | 51 (63.8)               | 34 (55.7)               | 36 (69.2)               | 34 (57.6)             |
| > 40                   | 16 (20.0)               | 13 (21.3)               | 11 (21.2)               | 13 (22.0)             |

There are no significant differences in median vitamin D concentration by season ( $p=0.650$  by Kruskal-Wallis test). Season is not associated with vitamin D concentration ( $p=0.630$  by chi-square test).
